# Supplementary material for: Multi-Injection Pharmacokinetics of Meloxicam in Kemp’s Ridley (Lepidochelys kempii) and Green (Chelonia mydas) Sea Turtles after Subcutaneous Administration
Source: MDPI journal article supplement (doi:10.3390/ani11123522), 2021-12-10
Supplement: s1 [file s1]

Supplementary Table S1. Pre- and post-MLX treatment blood analytes in green and Kemp's ridley sea turtles\*

| Analytes                               | Pre-treatment<br>n = 12 | Post-treatment<br>n = 12 | p      |
|----------------------------------------|-------------------------|--------------------------|--------|
| <b>Plasma chemistry</b>                |                         |                          |        |
| AST U/L                                | 484 (182, 817)          | 457 (212, 735)           | 0.73   |
| Creatine kinase U/L                    | 1516 (267, 13776)       | 1270 (381, 19484)        | 0.33   |
| Albumin g/dL                           | 1.0 (0.7, 1.7)          | 1.4 (0.7, 1.7)           | 0.17   |
| Total Protein g/dL                     | 3.5 (2.9, 4.1)          | 4.0 (3.2, 4.5)           | < 0.01 |
| Globulin g/dL                          | 0.7 (0.4, 1.1)          | 0.8 (0.5, 1.0)           | 0.02   |
| A/G Ratio                              | 0.6 (0.3, 0.9)          | 0.6 (0.3, 0.7)           | 0.42   |
| Urea Nitrogen mg/dL                    | 86 (23, 103)            | 77 (18, 127)             | 0.76   |
| Cholesterol mg/dL                      | 185 (110, 386)          | 183 (141, 398)           | 0.06   |
| Glucose mg/dL                          | 110 (78, 124)           | 125 (93, 146)            | < 0.01 |
| Calcium mg/dL                          | 6.4 (5.0, 7.9)          | 6.6 (5.7, 6.9)           | 0.96   |
| Phosphorus mg/dL                       | 9.7 (4.9, 13.1)         | 10 (5.50, 15.6)          | 0.05   |
| Chloride mEq/L                         | 118 (107, 125)          | 120 (107, 128)           | 0.05   |
| Potassium mEq/L                        | 4.1 (3.5, 5.2)          | 4.3 (3.2, 5.1)           | 0.14   |
| Sodium mEq/L                           | 150 (145, 164)          | 150 (145, 164)           | 0.19   |
| Uric Acid mg/dL                        | 0.8 (0.4, 1.5)          | 0.9 (0.6, 1.3)           | 0.81   |
| Triglycerides mg/dL                    | 189 (41, 487)           | 28 (50, 1244)            | 0.06   |
| Total protein (refractometer) g/dL     | 4.0 (3.3, 5.2)          | 4.4 (3.6, 6.1)           | 0.07   |
| <b>Protein electrophoresis</b>         |                         |                          |        |
| Albumin g/dL                           | 1.00 (9.65, 1.72)       | 1.37 (0.66, 1.74)        | 0.17   |
| Alpha-1 globulins g/dL                 | 0.25 (0.14, 0.57)       | 0.24 (0.14, 0.58)        | 0.27   |
| Alpha-2 globulins g/dL                 | 0.49 (0.31, 0.83)       | 0.62 (0.36, 0.94)        | < 0.01 |
| Beta-globulins g/dL                    | 0.79 (0.48, 1.18)       | 0.83 (0.57, 1.13)        | 0.30   |
| Gamma-globulins g/dL                   | 0.70 (0.44, 1.01)       | 0.75 (0.45, 1.04)        | 0.02   |
| A/G ratio                              | 0.57 (0.30, 0.88)       | 0.63 (0.29, 0.71)        | 0.42   |
| <b>Hematology</b>                      |                         |                          |        |
| WBC estimate/ $\mu$ l                  | 12100 (8200, 14400)**   | 12700 (8200, 23900)**    | 0.41   |
| Absolute Heterophils/ $\mu$ l          | 5400 (1400, 8200)**     | 7500 (740, 17000)**      | 0.24   |
| Absolute immature heterophils/ $\mu$ l | 0 (0, 0)**              | 0 (0, 160)**             | ND     |
| Absolute Lymphocytes/ $\mu$ l          | 4000 (2100, 5700)**     | 4200 (2800, 8100)**      | 0.70   |
| Absolute Monocytes/ $\mu$ l            | 1600 (740, 1900)**      | 1600 (570, 2400)**       | 0.55   |
| Absolute Eosinophils/ $\mu$ l          | 200 (0, 1000)**         | 100 (0, 640)**           | 0.09   |
| Absolute Basophils/ $\mu$ l            | 80 (0, 1600)**          | 110 (0, 1100)**          | 0.29   |
| Packed cell volume (%)                 | 32 (28, 35)             | 30 (24, 34)              | 0.20   |
| Polychromasia                          | 0 (0, 3)                | 1 (0, 2)                 | 0.37   |
| Anisocytosis                           | (0, 2)                  | 0 (0, 2)                 | 0.75   |
| Thrombocytes                           | adequate                | adequate                 |        |

\*Data are presented as median (minimum, maximum). \*\*n = 11. NA = Not applicable. ND = Not determined

Supplementary Table S2. Pre- and post-MLX treatment blood analytes in green sea turtles\*

| Analytes                           | Pre-treatment<br>n = 6 | Post-treatment<br>n = 6 | p    |
|------------------------------------|------------------------|-------------------------|------|
| <b>Plasma chemistry</b>            |                        |                         |      |
| AST U/L                            | 281 (182, 352)         | 303 (212, 586)          | 0.56 |
| Creatine kinase U/L                | 1258 (167, 11322)      | 964 (381, 19484)        | 0.99 |
| Albumin g/dL                       | 1.4 (1.1, 1.7)         | 1.4 (1.3, 1.7)          | 0.43 |
| Total Protein g/dL                 | 3.7 (2.9, 4.1)         | 4.1 (3.7, 4.4)          | 0.09 |
| Globulin g/dL                      | 0.8 (0.5, 1.0)         | 0.9 (0.7, 1.0)          | 0.21 |
| A/G Ratio                          | 0.7 (0.7, 0.9)         | 0.7 (0.6, 0.7)          | 0.20 |
| Urea Nitrogen mg/dL                | 59 (23, 97)            | 33 (18, 80)             | 0.12 |
| Cholesterol mg/dL                  | 162 (110, 197)         | 161 (141, 272)          | 0.43 |
| Glucose mg/dL                      | 110 (78, 123)          | 120 (93, 130)           | 0.21 |
| Calcium mg/dL                      | 6.2 (5.0, 7.4)         | 6.5 (5.7, 6.8)          | 0.68 |
| Phosphorus mg/dL                   | 12.0 (4.9, 13.1)       | 11.8 (5.5, 15.6)        | 0.21 |
| Chloride mEq/L                     | 121 (107, 125)         | 117 (107, 128)          | 0.62 |
| Potassium mEq/L                    | 4.2 (4.0, 5.2)         | 4.7 (4.2, 5.1)          | 0.18 |
| Sodium mEq/L                       | 153 (145, 154)         | 155 (145, 164)          | 0.25 |
| Uric Acid mg/dL                    | 1.0 (0.7, 1.5)         | 1.0 (0.7, 1.3)          | 0.25 |
| Triglycerides mg/dL                | 238 (77, 487)          | 191 (50, 1244)          | 0.84 |
| Total protein (refractometer) g/dL | 4.15 (3.30, 5.20)      | 4.30 (3.60, 6.10)       | 0.56 |
| <b>Protein electrophoresis</b>     |                        |                         |      |
| Albumin g/dL                       | 1.35 (1.08, 1.72)      | 1.43 (1.33, 1.74)       | 0.43 |
| Alpha-1 globulins g/dL             | 0.22 (0.14, 0.27)      | 0.21 (0.14, 0.36)       | 0.87 |
| Alpha-2 globulins g/dL             | 0.47 (0.31, 0.60)      | 0.62 (0.36, 0.72)       | 0.03 |
| Beta-globulins g/dL                | 0.62 (0.48, 0.80)      | 0.78 (0.57, 0.84)       | 0.09 |
| Gamma-globulins g/dL               | 0.79 (0.50, 1.01)      | 0.91 (0.70, 1.04)       | 0.21 |
| A/G ratio                          | 0.70 (0.66, 0.88)      | 0.67 (0.62, 0.71)       | 0.21 |
| <b>Hematology</b>                  |                        |                         |      |
| WBC estimate/μl                    | 12100 (8400, 13600)**  | 9900 (8200, 11200)**    | 0.12 |
| Absolute Heterophils/μl            | 5400 (1400, 7900)**    | 4000 (740, 6200)**      | 0.12 |
| Absolute immat heterophils/μl      | 0 (0, 0)**             | 0 (0, 160)**            | ND   |
| Absolute Lymphocytes/μl            | 4400 (2100, 5700)**    | 4200 (3100, 8100)**     | 0.81 |
| Absolute Monocytes/μl              | 1200 (840, 1800)**     | 1500 (570, 1600)**      | 0.99 |
| Absolute Eosinophils/μl            | 130 (0, 820)**         | 0 (0, 100)**            | 0.25 |
| Absolute Basophils/μl              | 360 (80, 1600)**       | 180 (0, 1100)**         | 0.12 |
| Packed cell volume %               | 31 (28, 34)            | 31 (24, 34)             | 0.62 |
| Polychromasia                      | 0 (0, 3)**             | 1 (0, 2)**              | ND   |
| Anisocytosis                       | 0 (0, 2)**             | 0 (0, 2)**              | ND   |
| Thrombocytes                       | adequate               | adequate                |      |

\*Data are presented as median (minimum, maximum). \*\*n = 5. NA = Not applicable. ND = Not determined

Supplementary Table S3. Pre- and post-MLX treatment blood analytes in Kemp's ridley sea turtles\*

| Analytes                           | Pre-treatment<br>n = 6 | Post-treatment<br>n = 6 | p    |
|------------------------------------|------------------------|-------------------------|------|
| <b>Plasma chemistry</b>            |                        |                         |      |
| AST U/L                            | 674 (616, 817)         | 634 (409, 735)          | 0.31 |
| Creatine kinase U/L                | 1765 (908, 13776)      | 1353 (983, 1714)        | 0.21 |
| Albumin g/dL                       | 0.9 (0.7, 0.9)         | 0.90 (0.7, 1.7)         | 0.43 |
| Total Protein g/dL                 | 3.5 (3.1, 4.1)         | 3.9 (3.2, 4.5)          | 0.03 |
| Globulin g/dL                      | 0.6 (0.4, 0.8)         | 0.7 (0.5, 0.8)          | 0.03 |
| A/G Ratio                          | 0.4 (0.3, 0.5)         | 0.4 (0.3, 0.6)          | 0.99 |
| Urea Nitrogen (BUN) mg/dL          | 98 (82, 103)           | 117 (68, 127)           | 0.09 |
| Cholesterol mg/dL                  | 194 (161, 386)         | 203 (181, 398)          | 0.06 |
| Glucose mg/dL                      | 113 (84, 124)          | 128 (106, 146)          | 0.06 |
| Calcium mg/dL                      | 6.8 (5.4, 7.9)         | 6.6 (6.0, 6.9)          | 0.68 |
| Phosphorus mg/dL                   | 9.0 (8.3, 9.8)         | 9.7 (8.3, 13.1)         | 0.31 |
| Chloride mEq/L                     | 115 (113, 123)         | 120 (115, 125)          | 0.03 |
| Potassium mEq/L                    | 3.7 (3.5, 4.2)         | 4.0 (3.2, 4.6)          | 0.56 |
| Sodium mEq/L                       | 149 (147, 151)         | 149, 154)               | 0.62 |
| Uric Acid mg/dL                    | 0.7 (0.4, 1.2)         | 0.9 (0.6, 1.0)          | 0.50 |
| Triglycerides mg/dL                | 146 (41, 213)          | 334 (77, 553)           | 0.03 |
| Total protein (refractometer) g/dL | 4.0 (3.6, 5.0)         | 4.5 (3.8, 5.1)          | 0.03 |
| <b>Protein electrophoresis</b>     |                        |                         |      |
| Albumin g/dL                       | 0.85 (0.65, 0.93)      | 0.89 (0.66, 1.74)       | 0.43 |
| Alpha-1 globulins g/dL             | 0.35 (0.23, 0.57)      | 0.38 (0.23, 0.58)       | 0.31 |
| Alpha-2 globulins g/dL             | 0.49 (0.42, 0.83)      | 0.62 (0.50, 0.94)       | 0.03 |
| Beta-globulins g/dL                | 1.00 (0.79, 1.18)      | 1.03 (0.71, 1.13)       | 0.56 |
| Gamma-globulins g/dL               | 0.62 (0.44, 0.75)      | 0.70 (0.45, 0.81)       | 0.03 |
| A/G ratio                          | 0.41 (0.30, 0.48)      | 0.38 (0.29, 0.64)       | 0.99 |
| <b>Hematology</b>                  |                        |                         |      |
| WBC estimate/μl                    | 12050 (8200, 14400)    | 15000 (12700, 23900)    | 0.03 |
| Absolute Heterophils/μl            | 6200 (3500, 8200)      | 8650 (7500, 17000)      | 0.03 |
| Absolute immat heterophils/μl      | 0 (0, 0)               | 0.00 (0.00, 0.00)       | ND   |
| Absolute Lymphocytes/μl            | 4000 (3400, 5300)      | 4100 (2800, 4600)       | 0.99 |
| Absolute Monocytes/μl              | 1600 (740, 1900)       | 1750 (1500, 2400)       | 0.43 |
| Absolute Eosinophils/μl            | 385 (0, 1000)          | 250 (0, 640)            | 0.31 |
| Absolute Basophils/μl              | 0 (0, 110)             | 0 (0, 240)              | ND   |
| Packed cell volume %               | 32 (29, 35)            | 30 (26, 33)             | 0.21 |
| Polychromasia                      | 0 (0, 0)               | 0 (0, 0)                | ND   |
| Anisocytosis                       | 0 (0, 0)               | 0 (0, 0)                | ND   |
| Thrombocytes                       | adequate               | adequate                |      |

\*Data are presented as median (minimum, maximum). NA = Not applicable. ND = Not determined
